# Supplementary material for: Relative Abundance of Lipid Metabolites in Spermatozoa across Three Compartments
Source: MDPI journal article supplement (doi:10.3390/ijms231911655), 2022-10-01

## **Supplementary Material: Tables and Table legends**

Tables S1-3 – see supplementary Excel file.

Table S1: Fatty acids measured in this study.

Table S2: Lipid species measured in positive ionisation mode

Table S3: Lipid species measured in negative ionisation mode

Abbreviations used in tables S1-S3:

Ceramides (CERs), cholesterol (CHOL), cholesterol esters (CEs), diglycerides (DG), fatty acids (FAs), lysophosphatidylcholines (LPCs), lysophosphatidylethanolamines (LPEs), phosphatidylcholines (PCs), phosphatidylcholine-plasmalogens (PC-Os), phosphatidylethanolamines (PEs), phosphatidylethanolamine-plasmalogens (PE-Os), phosphatidylglycerides (PGs), phosphatidylinositols (PIs), phosphatidylserines (PSs), sphingomyelins (SMs), and triglycerides (TGs).

**Supplementary Table S4. Characteristics of participants included in this study. Men were categorised into groups according to progressive motility (< or ≥ median; 50% progressive motility); sperm count (≤ or > median; 92 million/ ejaculate) and total semen volume (≤ or > median; 3.4 ml). Data are presented as median (range).**

|                                       | All participants      | Motility analysis   |                     | Sperm number analysis |                     | Semen volume analysis |                        |
|---------------------------------------|-----------------------|---------------------|---------------------|-----------------------|---------------------|-----------------------|------------------------|
|                                       |                       | LOW MOTILITY        | HIGH MOTILITY       | LOW SPERM NUMBER      | HIGH SPERM NUMBER   | LOW SEMEN VOLUME      | HIGH SEMEN VOLUME      |
|                                       | n=26                  | n=12                | n=14                | n=13                  | n=13                | n=12                  | n=14                   |
| Age, years                            | 35 (20 - 45)          | 36.5 (24 - 45)      | 32.5 (20 - 40)      | 32 (20 - 38)          | 37 (27 - 45)        | 35 (26 - 45)          | 34 (20 - 40)           |
| BMI, kg/m <sup>2</sup>                | 30.4 (24 - 36.5)      | 30.2 (24 - 36.5)    | 30.4 (26 - 33)      | 26 (24 - 36.5)        | 33 (30.2 - 34.4)    | 26 (26 - 33)          | 33 (24 - 36.5)         |
| Abstinence, days                      | 4 (2 - 9)             | 4 (3 - 8)           | 3 (2 - 9)           | 3 (2 - 9)             | 4 (3 - 8)           | 3 (2 - 8)             | 4 (3 - 9)              |
| Semen volume, ml                      | 3.4 (1.8 - 8.3)       | 4.35 (2.8 - 8.3)    | 3.2 (1.8 - 5.7)     | 3.1 (2.2 - 5.3)       | 4.7 (1.8 - 8.3)     | 2.8 (1.8 - 3.2)       | 4.7 (3.4 - 8.3)        |
| Semen pH                              | 8.5 (8 - 8.5)         | 8.5 (8 - 8.5)       | 8.5 (8 - 8.5)       | 8.5 (8 - 8.5)         | 8.5 (8 - 8.5)       | 8.25 (8 - 8.5)        | 8.5 (8 - 8.5)          |
| Sperm concentration million/ml        | 26.75 (2.6 - 209)     | 21.2 (2.6 - 209)    | 27.25 (7.5 - 196)   | 13.3 (2.6 - 37.9)     | 38.4 (18.6 - 209)   | 28.95 (3.1 - 209)     | 26.25 (2.6 - 196)      |
| Total motility %                      | 56 (28 - 73)          | 45 (28 - 56)        | 62.5 (54 - 73)      | 61 (36 - 73)          | 56 (28 - 65)        | 58.5 (40 - 73)        | 53 (28 - 73)           |
| Progressive motility %                | 50 (24 - 68)          | 40 (24 - 49)        | 58 (50 - 68)        | 50 (32 - 68)          | 50 (24 - 63)        | 53.5 (35 - 64)        | 49 (24 - 68)           |
| Non-progressive motility %            | 5 (1 - 13)            | 6 (2 - 9)           | 5 (1 - 13)          | 6 (3 - 13)            | 4 (1 - 8)           | 5.5 (2 - 10)          | 5 (1 - 13)             |
| Immotile %                            | 44 (27 - 72)          | 55 (44 - 72)        | 38 (27 - 46)        | 39 (27 - 64)          | 44 (35 - 72)        | 41.5 (28 - 60)        | 47 (27 - 72)           |
| Total sperm number millions/ejaculate | 91.825 (8.68 - 921.2) | 89.9 (8.68 - 606.1) | 93.325 (24 - 921.2) | 49.21 (8.68 - 90.65)  | 175.78 (93 - 921.2) | 79.35 (8.68 - 606.1)  | 130.03 (13.78 - 921.2) |
| HbA1c mmol/mol                        | 37 (28 - 49)          | 37.5 (28 - 49)      | 37 (32 - 42)        | 37 (28 - 42)          | 38 (32 - 49)        | 36 (33 - 49)          | 37.5 (28 - 41)         |
| Random plasma glucose mmol/l          | 5.2 (4.4 - 8.2)       | 5.3 (4.4 - 8.2)     | 5.2 (4.7 - 6.5)     | 5.2 (4.4 - 6)         | 5.4 (4.8 - 8.2)     | 5.55 (4.7 - 8.2)      | 5.2 (4.4 - 5.6)        |

NB: WHO reference criteria for normal semen characteristics are:

Progressive motility 32-75%

Total sperm count 39-928 million / ejaculate

Semen volume 1.5-7.6 ml

## Legends for Supplementary Figures

Figure S1: Distribution of lipid species across the three compartments. Lipid were included as follows: ceramides (CERs), cholesterol (CHOL), cholesterol esters (CEs), diglycerides (DG), fatty acids (FAs), lysophosphatidylcholines (LPCs), lysophosphatidylethanolamines (LPEs), phosphatidylcholines (PCs), phosphatidylcholine-plasmalogens (PC-Os), phosphatidylethanolamines (PEs), phosphatidylethanolamine-plasmalogens (PE-Os), phosphatidylglycerides (PGs), phosphatidylinositols (PIs), phosphatidylserines (PSs), polyunsaturated fatty acids (PUFAs), sphingomyelins (SMs), and triglycerides (TGs). Species were only included if  $p \leq 0.001$ .

### HIGHER IN BLOOD, LOWER IN SEMINAL FLUID

|            |          |          |             |             |            |           |            |
|------------|----------|----------|-------------|-------------|------------|-----------|------------|
| LPC(15:0)  | PC(33:0) | PC(37:2) | PC(41:6)    | PC-O(40:4)  | PI(35:0)   | DG(34:3)  | TG(52:05)  |
| LPC(17:0)  | PC(33:1) | PC(37:3) | PC(41:7)    | PC-O(40:5)  | PI(38:4)   | DG(36:3)  | TG(54:03)  |
| LPC(18:1)  | PC(33:2) | PC(37:4) | PC(42:2)    | PC-O(40:6)  | PI(39:0)   | DG(36:4)  | TG(54:04)  |
| LPC(18:2)  | PC(33:3) | PC(37:5) | PC(42:5)    | PC-O(44:4)  | PI-O(36:1) | TG(42:05) | TG(54:05)  |
| LPE(20:0)  | PC(34:1) | PC(37:6) | PC(43:4)    | PE(36:2)    | SM(34:02)  | TG(46:01) | TG(54:10)  |
| LPE(20:2)  | PC(34:2) | PC(38:2) | PC(44:2)    | PE(38:1)    | SM(36:02)  | TG(46:05) | TGox(45:5) |
| LPS(22:1)  | PC(34:2) | PC(38:4) | PC(52:4)    | PE(38:2)    | SM(39:02)  | TG(48:01) | TGox(45:6) |
| PA-O(42:2) | PC(35:1) | PC(38:5) | PC-O(34:01) | PE(40:3)    | SM(40:02)  | TG(48:02) | TGox(46:5) |
| PC(32:0)   | PC(35:2) | PC(38:6) | PC-O(32:0)  | PE(40:4)    | SM(41:00)  | TG(48:05) | TGox(46:6) |
| PC(34:1)   | PC(35:3) | PC(39:5) | PC-O(35:4)  | PE(40:39:2) | SM(41:01)  | TG(50:01) | TGox(47:5) |
| PC(34:2)   | PC(35:4) | PC(39:6) | PC-O(36:2)  | PG(41:0)    | SM(42:02)  | TG(50:02) | TGox(47:6) |
| PC(34:3)   | PC(35:5) | PC(40:2) | PC-O(36:4)  | PG(42:2)    | SM(42:03)  | TG(50:03) | TGox(47:7) |
| PC(36:3)   | PC(36:1) | PC(40:3) | PC-O(38:3)  | PG(43:3)    | SM(48:01)  | TG(52:01) | TGox(48:6) |
| PC(36:4)   | PC(36:2) | PC(40:4) | PC-O(38:4)  | PG(44:4)    | FA(16:2)   | TG(52:02) | TGox(49:7) |
| PC(36:5)   | PC(36:3) | PC(40:5) | PC-O(38:6)  | PG-O(40:3)  | FA(18:2)   | TG(52:03) | TGox(50:8) |
| PC(38:5)   | PC(36:4) | PC(41:2) | PC-O(38:7)  | PI(34:2)    | FA(20:4)   | TG(52:04) | TGox(53:6) |

### LOWER IN BLOOD, HIGHER IN SEMINAL FLUID

|             |            |            |           |            |
|-------------|------------|------------|-----------|------------|
| LPE(16:0)   | PC(36:7)   | PE-O(36:5) | PI(48:5)  | FA(20:1)   |
| LPE(18:0)   | PC-O(33:1) | PE-O(38:4) | Cer(33:1) | FA(20:3)   |
| LPE(18:1)   | PC-O(35:0) | PE-O(38:6) | Cer(34:1) | FA(22:6)   |
| LPE-O(18:1) | PC-O(35:1) | PE-P(38:6) | Cer(36:1) | DG(28:0)   |
| LPE-P(16:0) | PC-O(37:1) | PE-P(40:6) | Cer(38:1) | DG(44:7)   |
| LPG(35:0)   | PC-O(29:1) | PG(34:0)   | Cer(40:1) | TG(44:4)   |
| PA(33:03)   | PE(32:6)   | PG(36:1)   | Cer(42:1) | TG(46:4)   |
| PA-O(36:0)  | PE(40:7)   | PG(45:7)   | SM(33:1)  | TG(48:4)   |
| PA-O(42:0)  | PE(34:1)   | PG-O(35:0) | SM(34:1)  | TGox(46:6) |
| PC(30:2)    | PE(40:1)   | PG-O(39:0) | SM(35:1)  | TGox(46:3) |
| PC(32:2)    | PE(42:1)   | PG-O(41:0) | SM(37:1)  | TGox(46:7) |
| PC(32:3)    | PE-O(34:2) | PI(32:0)   | SM(38:1)  | TGox(46:8) |
| PC(34:3)    | PE-O(34:3) | PI(34:0)   | SM(39:1)  | TGox(48:3) |
| PC(34:4)    | PE-O(36:2) | PI(34:1)   | SM(40:1)  | TGox(48:9) |
| PC(36:0)    | PE-O(36:3) | PI(36:1)   | SM(41:0)  | TGox(51:0) |
| PC(36:6)    | PE-O(36:4) | PI(38:2)   | SM(42:1)  |            |

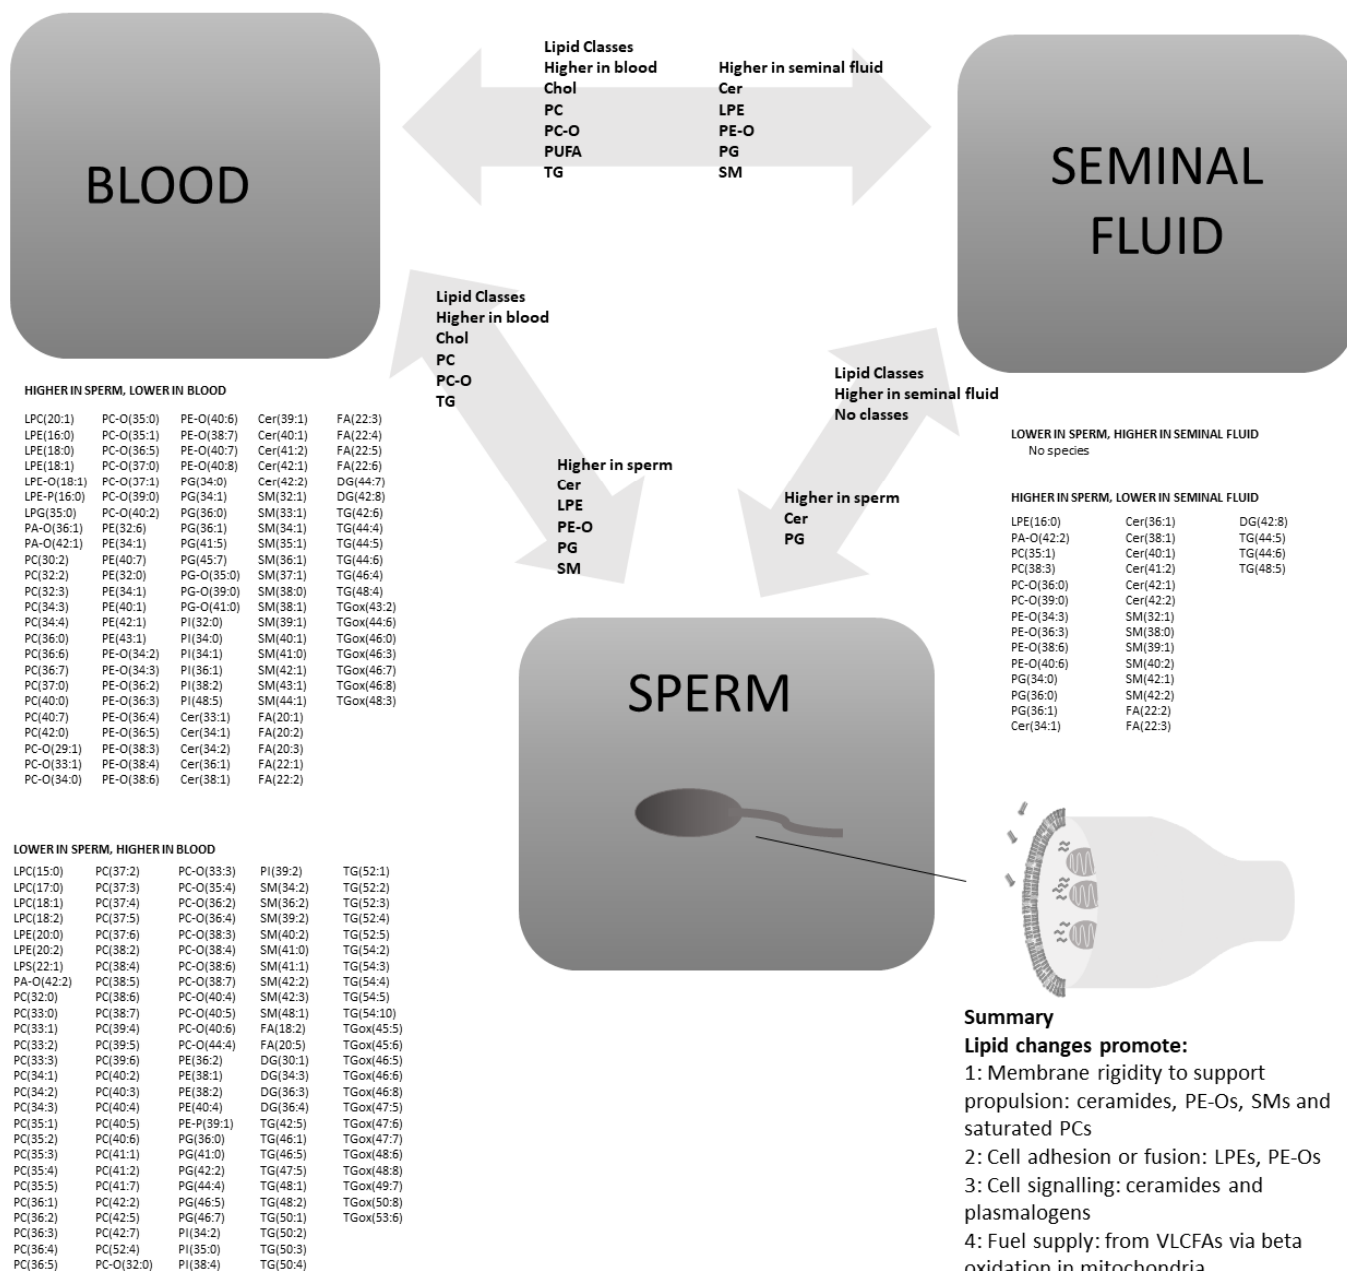

Figure S2: Distribution of lipids across three compartments shown in manhattan plots and heatmaps of relative abundance (a-c) and significance (d-f). Manhattan plots: lipid metabolites were tested for significance ( $-\log P$ ) and fold change between low motility and high motility groups within each compartment using unpaired t tests. Heatmap 1: Lipid metabolites were compared for relative abundance raw counts (a-b) and normalised to blood (c-d). Heatmap 2: Lipid metabolites were tested for significance ( $-\log P$ ) between low motility and high motility groups within each compartment using paired t tests. Lipid were identified as follows: ceramides (CERs), cholesterol (CHOL), cholesterol esters (CEs), diglycerides (DG), fatty acids (FAs), lysophosphatidylcholines (LPCs), lysophosphatidylethanolamines (LPEs), phosphatidylcholines (PCs), phosphatidylcholine-plasmalogens (PC-Os), phosphatidylethanolamines (PEs), phosphatidylethanolamine-plasmalogens (PE-Os), phosphatidylglycerides (PGs), phosphatidylinositols (PIs), phosphatidylserines (PSs), polyunsaturated FAs (PUFAs), sphingomyelins (SMs), triglycerides (TGs).

MANHATTAN PLOTS

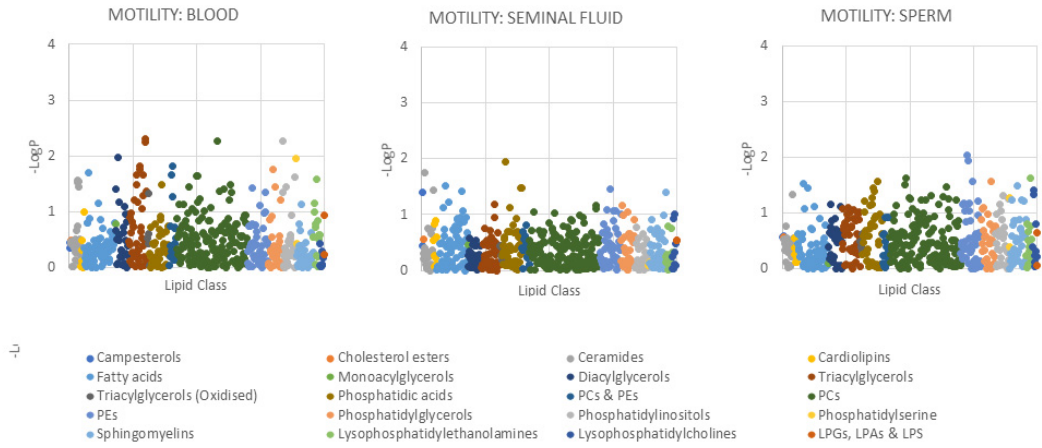

HEATMAP 1 – RELATIVE ABUNDANCE

| a      | HIGH MOTILITY |        |        | b      | LOW MOTILITY |        |        | c      | HIGH MOTILITY |        |        | d      | LOW MOTILITY |        |        | Key                                                 |
|--------|---------------|--------|--------|--------|--------------|--------|--------|--------|---------------|--------|--------|--------|--------------|--------|--------|-----------------------------------------------------|
|        | BLOOD         | SF     | SPERM  |        | BLOOD        | SF     | SPERM  |        | BLOOD         | SF     | SPERM  |        | BLOOD        | SF     | SPERM  |                                                     |
| CER    | 2.21          | 34.30  | 51.67  | CER    | 5.04         | 42.23  | 53.72  | CER    | 1.00          | 15.48  | 23.33  | CER    | 1.00         | 8.38   | 10.66  | Low Abundance<br>Medium Abundance<br>High Abundance |
| CER +  | 0.34          | 57.46  | 75.29  | CER +  | 0.53         | 60.08  | 77.88  | CER +  | 1.00          | 169.40 | 221.98 | CER +  | 1.00         | 114.31 | 148.18 |                                                     |
| CFA    | 21.18         | 27.39  | 33.21  | CFA    | 24.00        | 25.46  | 39.60  | CFA    | 1.00          | 1.29   | 1.57   | CFA    | 1.00         | 1.06   | 1.65   |                                                     |
| CHOL + | 126.90        | 23.07  | 5.35   | CHOL + | 123.21       | 15.04  | 27.23  | CHOL + | 1.00          | 0.18   | 0.04   | CHOL + | 1.00         | 0.12   | 0.22   |                                                     |
| EFA    | 4.12          | 5.88   | 7.41   | EFA    | 4.26         | 5.17   | 8.46   | EFA    | 1.00          | 1.43   | 1.80   | EFA    | 1.00         | 1.22   | 1.99   |                                                     |
| FA-OH  | 11.89         | 13.06  | 10.94  | FA-OH  | 14.60        | 9.82   | 11.71  | FA-OH  | 1.00          | 1.10   | 0.92   | FA-OH  | 1.00         | 0.67   | 0.80   |                                                     |
| LPC    | 81.41         | 39.89  | 34.78  | LPC    | 87.20        | 35.14  | 29.78  | LPC    | 1.00          | 0.49   | 0.43   | LPC    | 1.00         | 0.40   | 0.34   |                                                     |
| LPC +  | 175.34        | 177.60 | 188.01 | LPC +  | 161.97       | 155.44 | 140.70 | LPC +  | 1.00          | 1.01   | 1.07   | LPC +  | 1.00         | 0.96   | 0.87   |                                                     |
| LPE    | 157.24        | 375.24 | 360.36 | LPE    | 162.49       | 362.55 | 320.31 | LPE    | 1.00          | 2.39   | 2.29   | LPE    | 1.00         | 2.23   | 1.97   |                                                     |
| LPE +  | 0.38          | 44.83  | 58.90  | LPE +  | 0.11         | 34.98  | 35.85  | LPE +  | 1.00          | 118.40 | 155.59 | LPE +  | 1.00         | 307.26 | 314.84 |                                                     |
| MFA    | 98.99         | 111.29 | 128.80 | MFA    | 113.35       | 117.21 | 162.51 | MFA    | 1.00          | 1.12   | 1.30   | MFA    | 1.00         | 1.03   | 1.43   |                                                     |
| PC     | 323.56        | 73.87  | 79.60  | PC     | 316.99       | 67.02  | 74.23  | PC     | 1.00          | 0.23   | 0.25   | PC     | 1.00         | 0.21   | 0.23   |                                                     |
| PC +   | 393.27        | 74.74  | 80.62  | PC +   | 343.95       | 65.01  | 63.88  | PC +   | 1.00          | 0.19   | 0.20   | PC +   | 1.00         | 0.19   | 0.19   |                                                     |
| PC-O   | 177.19        | 38.59  | 36.75  | PC-O   | 177.35       | 33.29  | 35.09  | PC-O   | 1.00          | 0.22   | 0.21   | PC-O   | 1.00         | 0.19   | 0.20   |                                                     |
| PE     | 106.29        | 99.59  | 90.51  | PE     | 102.95       | 107.27 | 95.17  | PE     | 1.00          | 0.94   | 0.85   | PE     | 1.00         | 1.04   | 0.92   |                                                     |
| PE +   | 4.08          | 58.20  | 44.07  | PE +   | 3.97         | 80.00  | 59.82  | PE +   | 1.00          | 14.26  | 10.79  | PE +   | 1.00         | 20.16  | 15.07  |                                                     |
| PE-O   | 31.82         | 130.57 | 137.38 | PE-O   | 27.95        | 125.18 | 148.77 | PE-O   | 1.00          | 4.10   | 4.32   | PE-O   | 1.00         | 4.48   | 5.32   |                                                     |
| PG     | 5.71          | 12.57  | 17.09  | PG     | 5.47         | 13.62  | 21.44  | PG     | 1.00          | 2.20   | 2.99   | PG     | 1.00         | 2.49   | 3.92   |                                                     |
| PG +   | 4.25          | 3.44   | 3.34   | PG +   | 3.38         | 10.04  | 2.71   | PG +   | 1.00          | 0.81   | 0.79   | PG +   | 1.00         | 2.97   | 0.80   |                                                     |
| PI     | 36.76         | 35.50  | 37.33  | PI     | 31.91        | 38.67  | 37.40  | PI     | 1.00          | 0.97   | 1.02   | PI     | 1.00         | 1.21   | 1.17   |                                                     |
| PS +   | 5.05          | 13.98  | 10.30  | PS +   | 6.32         | 9.34   | 13.40  | PS +   | 1.00          | 2.77   | 2.04   | PS +   | 1.00         | 1.48   | 2.12   |                                                     |
| PUFA   | 69.71         | 44.06  | 49.71  | PUFA   | 86.02        | 44.57  | 60.44  | PUFA   | 1.00          | 0.63   | 0.71   | PUFA   | 1.00         | 0.52   | 0.70   |                                                     |
| SFA    | 818.32        | 830.71 | 809.49 | SFA    | 784.76       | 827.53 | 764.28 | SFA    | 1.00          | 1.02   | 0.99   | SFA    | 1.00         | 1.05   | 0.97   |                                                     |
| SM     | 74.65         | 154.61 | 149.02 | SM     | 78.96        | 168.46 | 177.77 | SM     | 1.00          | 2.07   | 2.00   | SM     | 1.00         | 2.13   | 2.25   |                                                     |
| SM +   | 94.18         | 385.48 | 405.30 | SM +   | 90.02        | 419.38 | 434.03 | SM +   | 1.00          | 4.09   | 4.30   | SM +   | 1.00         | 4.66   | 4.82   |                                                     |
| TG +   | 195.72        | 160.14 | 128.58 | TG +   | 266.11       | 150.52 | 144.02 | TG +   | 1.00          | 0.82   | 0.66   | TG +   | 1.00         | 0.57   | 0.54   |                                                     |

HEATMAP 2 - SIGNIFICANCE

| a     | HIGH MOTILITY GROUP |    |       | b     | LOW MOTILITY GROUP |       |       | Key                                                    |
|-------|---------------------|----|-------|-------|--------------------|-------|-------|--------------------------------------------------------|
|       | -LogP               | SF | Blood |       | -LogP              | SF    | Blood |                                                        |
| CE+   | 2.35                | SF | 0.45  | Sperm | 2.86               | Blood | 1.38  | 0.00<br>2.00<br>4.00<br>6.00<br>8.00<br>10.00<br>12.00 |
| CER+  | 4.11                | SF | 2.28  | Sperm | 8.20               | Blood | 4.52  |                                                        |
| CHOL+ | 3.57                | SF | 0.64  | Sperm | 5.63               | Blood | 3.03  |                                                        |
| EFA   | 1.15                | SF | 2.85  | Sperm | 2.77               | Blood | 1.66  |                                                        |
| FA-OH | 0.23                | SF | 4.62  | Sperm | 4.95               | Blood | 0.71  |                                                        |
| LCFA  | 1.21                | SF | 3.63  | Sperm | 6.27               | Blood | 1.46  |                                                        |
| LPC   | 4.36                | SF | 7.82  | Sperm | 8.42               | Blood | 5.35  |                                                        |
| LPC+  | 0.18                | SF | 0.43  | Sperm | 0.87               | Blood | 0.10  |                                                        |
| LPE   | 7.77                | SF | 6.31  | Sperm | 0.06               | Blood | 6.78  |                                                        |
| LPE+  | 2.49                | SF | 1.10  | Sperm | 4.01               | Blood | 3.19  |                                                        |
| LPI+  | 0.80                | SF | 0.72  | Sperm | 0.82               | Blood | 0.92  |                                                        |
| MFA   | 0.57                | SF | 4.48  | Sperm | 4.78               | Blood | 0.88  |                                                        |
| PC    | 5.41                | SF | 3.31  | Sperm | 8.66               | Blood | 4.72  |                                                        |
| PC+   | 5.17                | SF | 0.59  | Sperm | 6.33               | Blood | 5.93  |                                                        |
| PC-O  | 11.60               | SF | 5.77  | Sperm | 9.89               | Blood | 9.44  |                                                        |
| PE    | 2.96                | SF | 2.03  | Sperm | 2.01               | Blood | 4.18  |                                                        |
| PE+   | 3.45                | SF | 0.80  | Sperm | 3.69               | Blood | 4.01  |                                                        |
| PE-O  | 1.01                | SF | 6.65  | Sperm | 8.28               | Blood | 0.79  |                                                        |
| PG    | 1.58                | SF | 7.11  | Sperm | 0.39               | Blood | 2.19  |                                                        |
| PG+   | 0.19                | SF | 0.04  | Sperm | 0.34               | Blood | 1.48  |                                                        |
| PI    | 7.51                | SF | 8.95  | Sperm | 3.31               | Blood | 6.40  |                                                        |
| PI-O  | 8.63                | SF | 8.97  | Sperm | 7.49               | Blood | 8.18  |                                                        |
| PS+   | 1.34                | SF | 1.74  | Sperm | 0.83               | Blood | 0.41  |                                                        |
| PUFA  | 0.87                | SF | 0.92  | Sperm | 2.84               | Blood | 1.10  |                                                        |
| SFA   | 0.09                | SF | 8.88  | Sperm | 11.47              | Blood | 0.20  |                                                        |
| SM    | 9.57                | SF | 0.00  | Sperm | 0.00               | Blood | 8.42  |                                                        |
| SM+   | 6.05                | SF | 1.54  | Sperm | 8.73               | Blood | 6.62  |                                                        |
| TG+   | 0.90                | SF | 1.56  | Sperm | 1.39               | Blood | 3.31  |                                                        |

Figure S3: Men with lower motility often have other conditions affecting fertility, including low spermatozoa count and low semen volume (categorised below median for each).

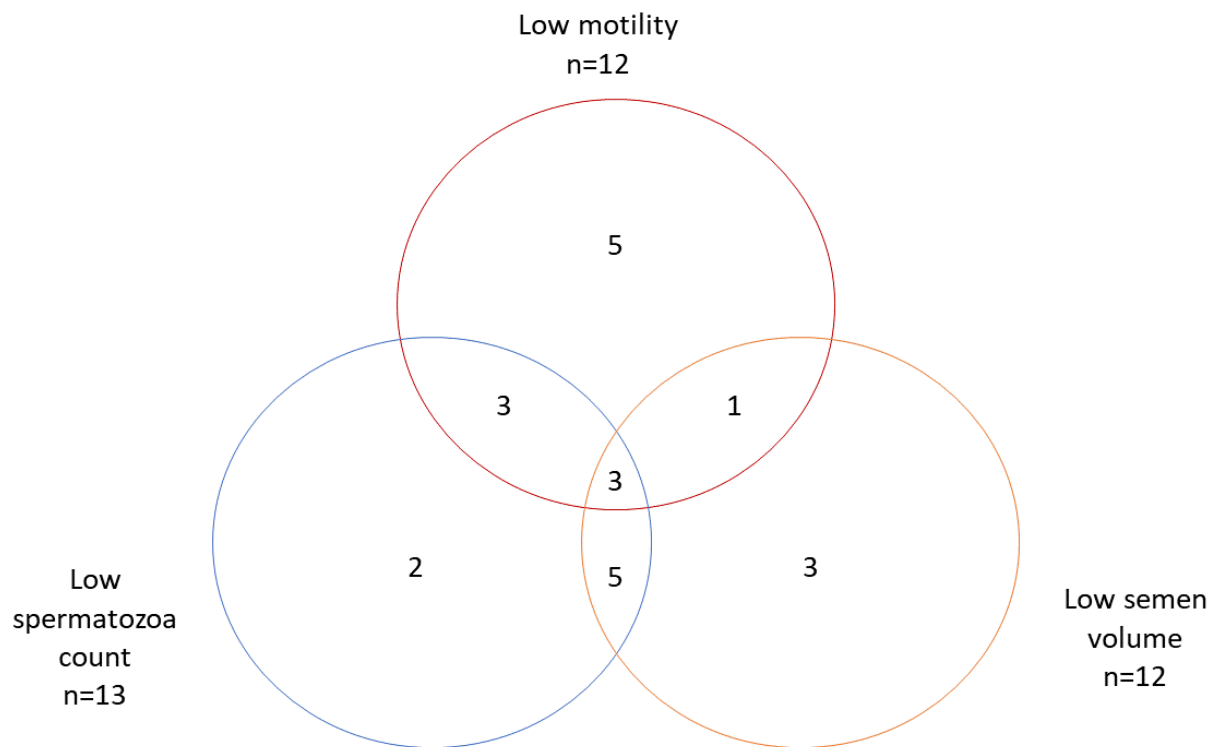

Figure S4: Significant differences in individual lipid species in association with sperm number between compartments. Lipid were included as follows: ceramides (CERs), cholesterol (CHOL), cholesterol esters (CEs), diglycerides (DG), fatty acids (FAs), lysophosphatidylcholines (LPCs), lysophosphatidylethanolamines (LPEs), phosphatidylcholines (PCs), phosphatidylcholine-plasmalogens (PC-Os), phosphatidylethanolamines (PEs), phosphatidylethanolamine-plasmalogens (PE-Os), phosphatidylglycerides (PGs), phosphatidylinositols (PIs), phosphatidylserines (PSs), polyunsaturated fatty acids (PUFAs), sphingomyelins (SMs), and triglycerides (TGs). Species were only included if  $p \leq 0.001$ .

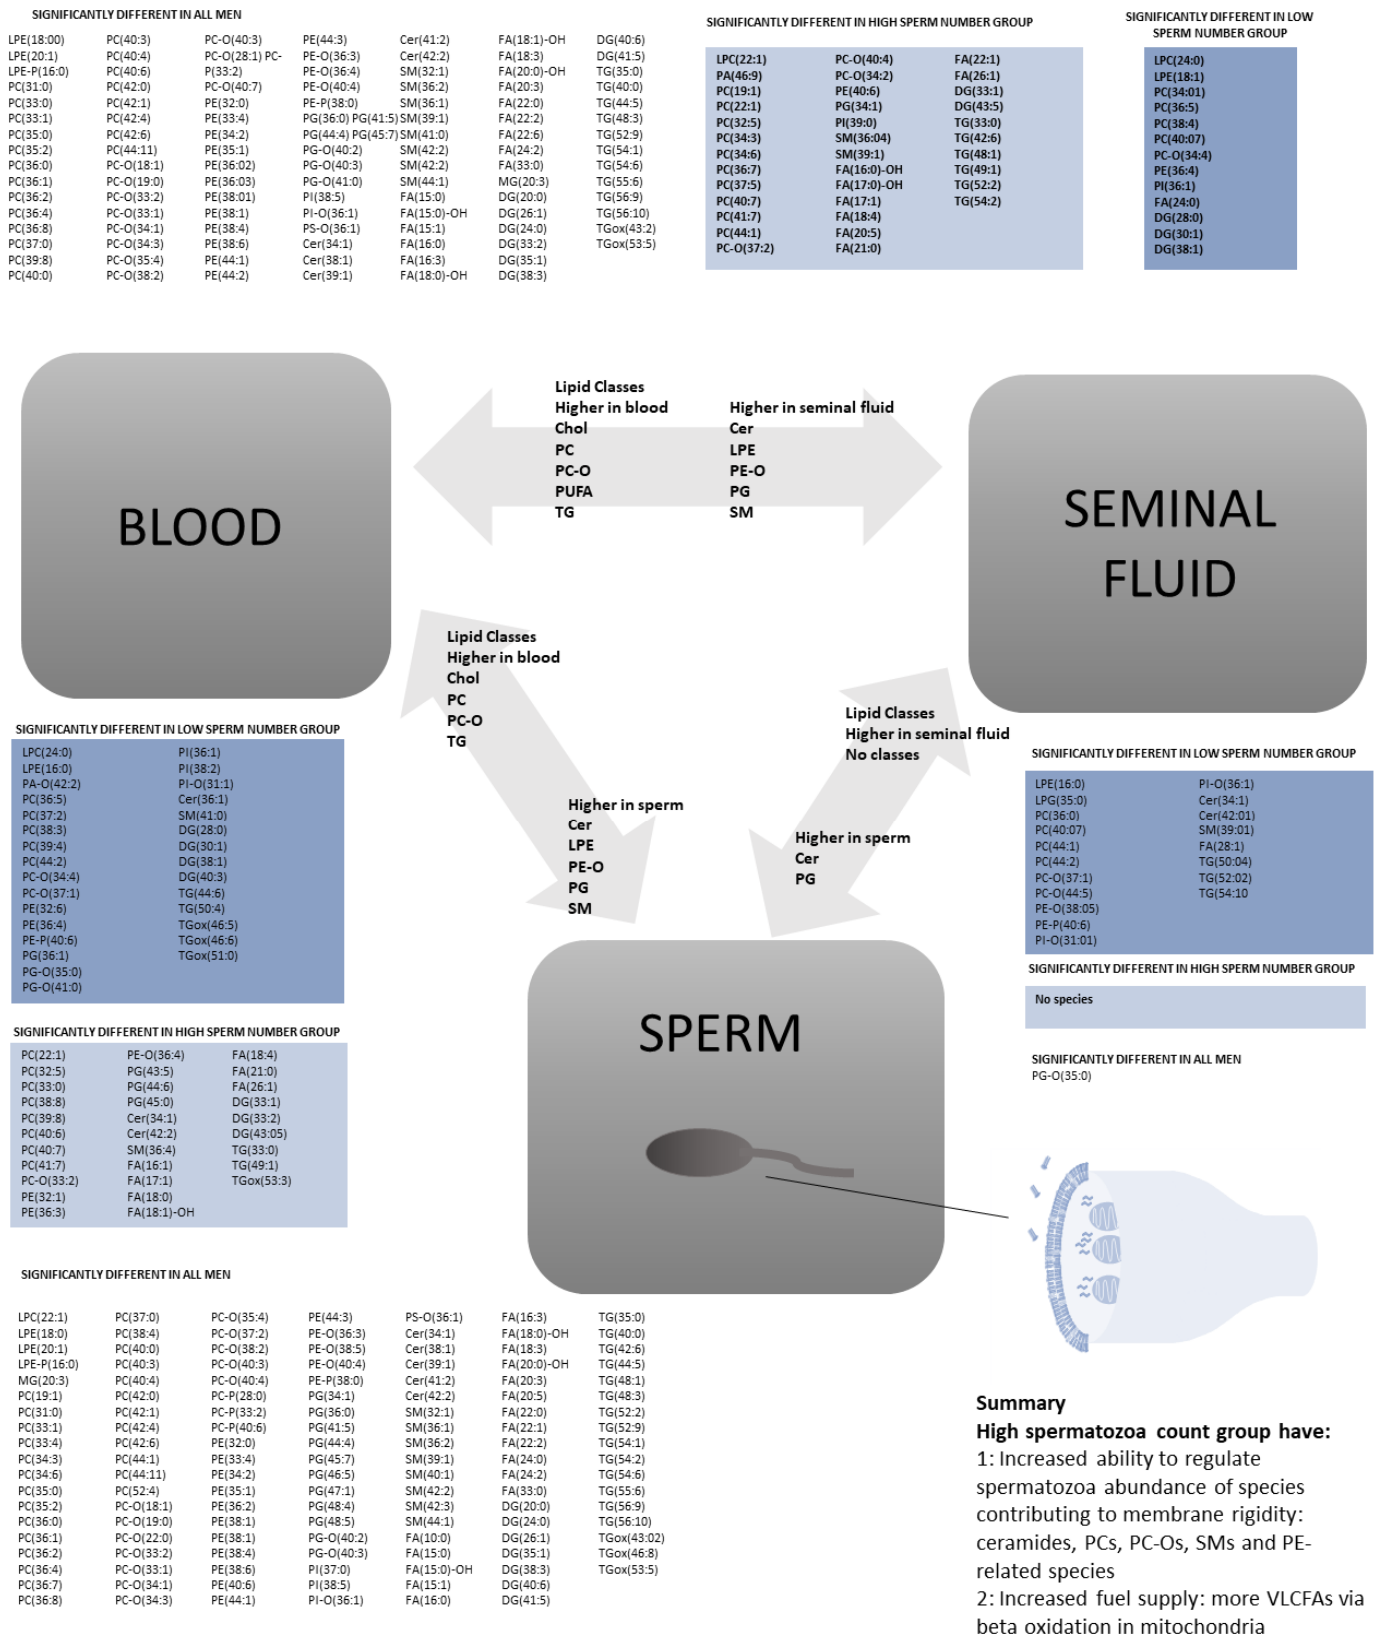



Figure S5: Significant differences in individual lipid species in association with semen volume between compartments. Lipid were included as follows: ceramides (CERs), cholesterol (CHOL), cholesterol esters (CEs), diglycerides (DG), fatty acids (FAs), lysophosphatidylcholines (LPCs), lysophosphatidylethanolamines (LPEs), phosphatidylcholines (PCs), phosphatidylcholine-plasmalogens (PC-Os), phosphatidylethanolamines (PEs), phosphatidylethanolamine-plasmalogens (PE-Os), phosphatidylglycerides (PGs), phosphatidylinositols (PIs), phosphatidylserines (PSs), polyunsaturated fatty acids (PUFAs), sphingomyelins (SMs), and triglycerides (TGs). Species were only included if  $p \leq 0.001$ .

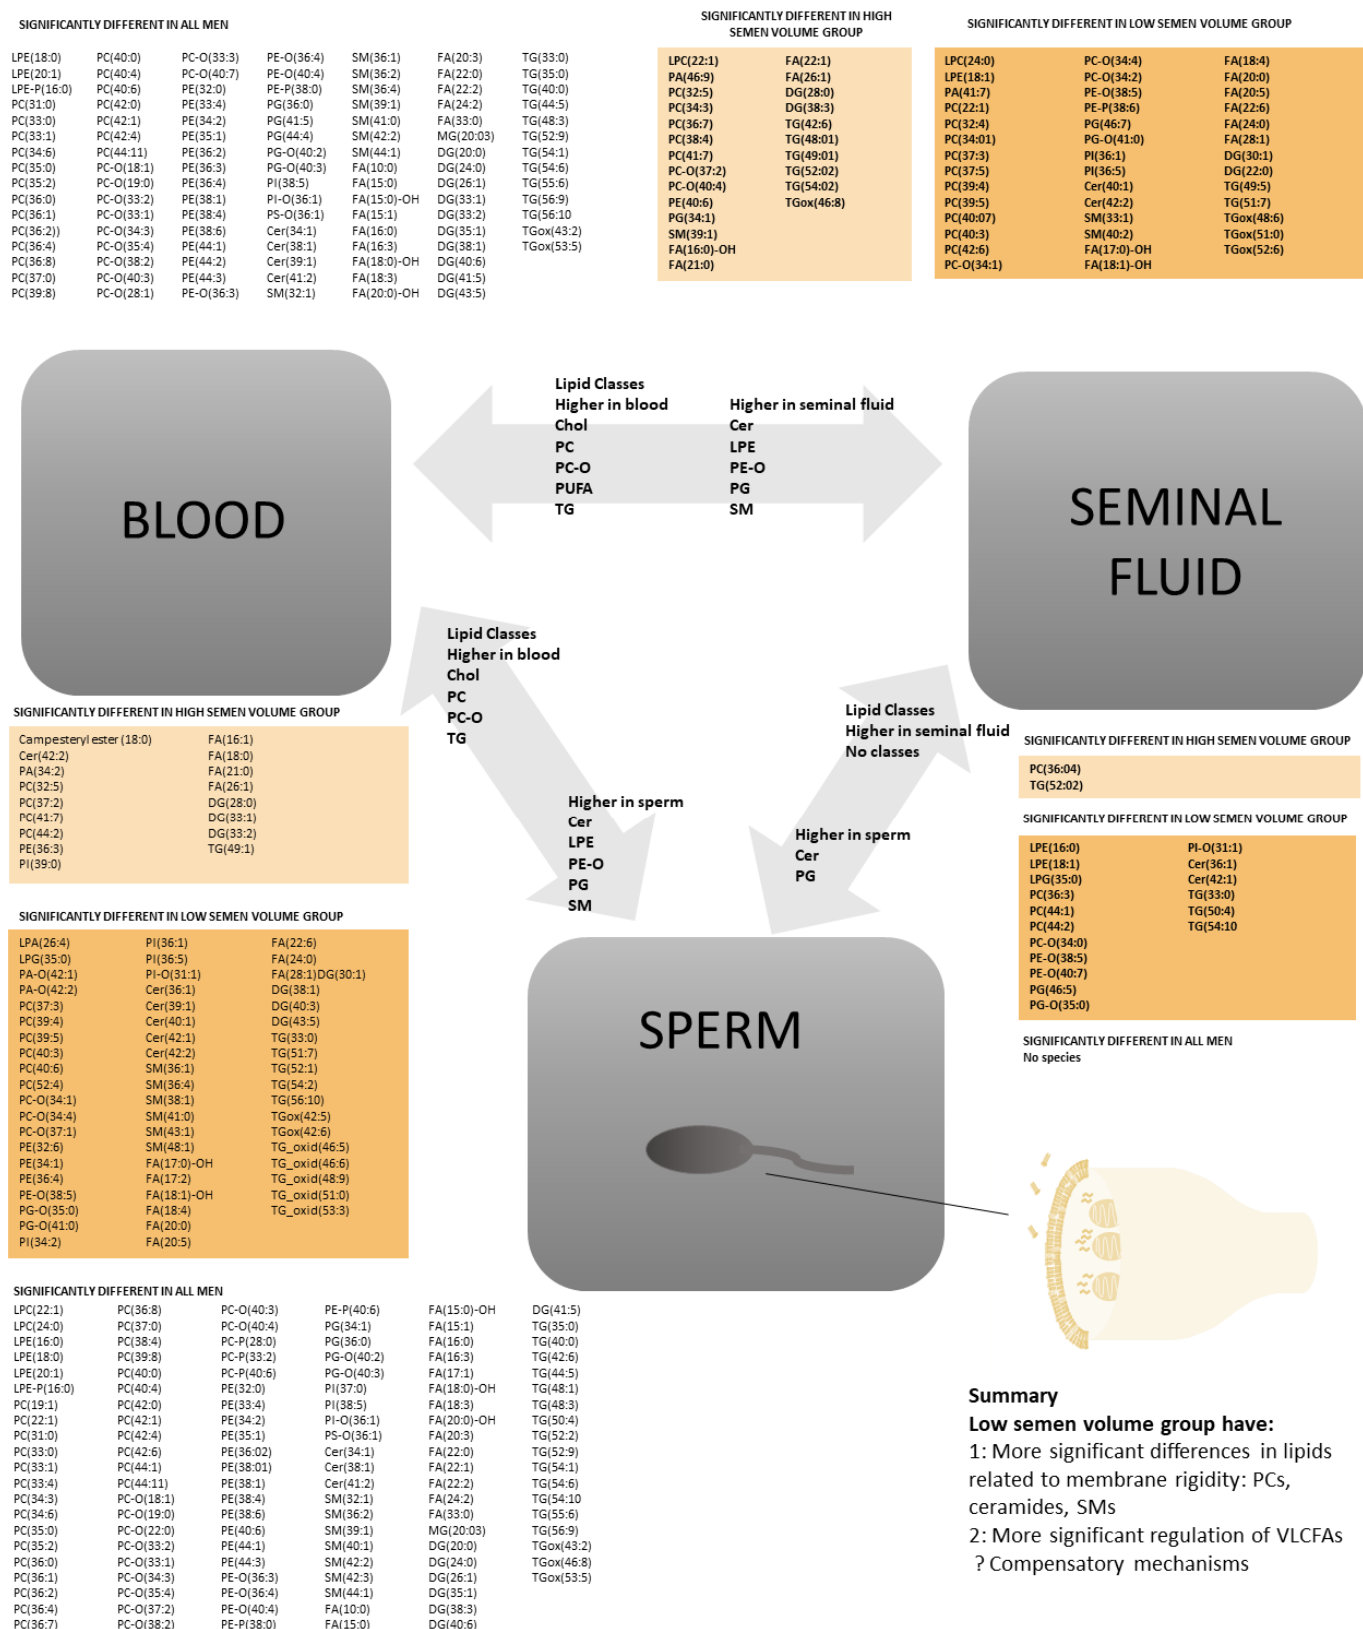

Supplement: s1 [file s1]
